# Supplementary material for: Risk factors, urodynamic characteristics, and distress associated with nocturnal enuresis in overactive bladder -wet women
Source: PubMed Central journal article supplement — Sci Rep. 2025 Jan 2;15:235. doi: 10.1038/s41598-024-84031-w (PMC11697377; doi:10.1038/s41598-024-84031-w), 2025-01-02
Supplement: 41598_2024_84031_MOESM1_ESM.pdf [file 41598_2024_84031_MOESM1_ESM.pdf]

**Risk Factors, Urodynamic Characteristics, and Distress Associated with  
Nocturnal Enuresis in Overactive Bladder -Wet Women**

**Kuan Chong Ng, MD<sup>a</sup>, Jeff Shih-Chieh Chueh, MD, PhD<sup>a</sup>, Shang-Jen Chang, MD,  
MPH<sup>a\*</sup>**

<sup>a</sup>Department of Urology, National Taiwan University Hospital, Taipei, Taiwan

**Female Urinary Tract Symptoms Questionnaire:**

This questionnaire aims to help us gain a deeper understanding of your urinary problems to compensate for the limited time during clinic visits and to enhance the effectiveness of treatment. Please fill it out with the help of your family if necessary, and bring it to us during your urodynamic study. Thank you!

A. Basic Information

1. Name: \_\_\_\_\_ Medical Record Number: \_\_\_\_\_
2. Date of Birth: \_\_\_\_\_
3. Height: \_\_\_ cm, Weight: \_\_\_ kg. Waist Circumference: \_\_\_ cm, Hip Circumference: \_\_\_ cm, Blood Type: \_\_\_.
4. Marital Status:  1. Single  2. Married  3. Divorced  4. Widowed
5. Education Level:  1. Illiterate  2. Primary School  3. Middle School  4. High School  5. College or Above
6. Occupation:  0. Unemployed  1. Manual Laborer  2. Non-Manual Laborer
7. Number of Deliveries: \_\_\_\_\_  
 Cesarean Sections: \_\_\_\_\_ Vaginal Deliveries: \_\_\_\_\_ Miscarriages: \_\_\_\_\_
8. Your current menstrual condition:  
 1. Regular  2. Irregular  3. Menopause

B. Main Urination Problem

What is your main urination problem during this visit? \_\_\_\_\_ How long has it been present?  
 \_\_\_\_\_

C. Urination in the Past Month

For each statement, select the most appropriate answer.

|                                                     | 0                        | 1                        | 2                        | 3                         | 4                             | 5                        |
|-----------------------------------------------------|--------------------------|--------------------------|--------------------------|---------------------------|-------------------------------|--------------------------|
|                                                     | Never                    | Rarely                   | Occasionally             | About<br>Half the<br>Time | More<br>than Half<br>the Time | Almost<br>Always         |
| 1. I need to urinate within 2 hours during the day. | <input type="checkbox"/> | <input type="checkbox"/> | <input type="checkbox"/> | <input type="checkbox"/>  | <input type="checkbox"/>      | <input type="checkbox"/> |
| 2. I feel an uncontrollable urge to urinate.        | <input type="checkbox"/> | <input type="checkbox"/> | <input type="checkbox"/> | <input type="checkbox"/>  | <input type="checkbox"/>      | <input type="checkbox"/> |
| 3. I feel my bladder does not empty completely.     | <input type="checkbox"/> | <input type="checkbox"/> | <input type="checkbox"/> | <input type="checkbox"/>  | <input type="checkbox"/>      | <input type="checkbox"/> |
| 4. I need multiple attempts to finish urinating.    | <input type="checkbox"/> | <input type="checkbox"/> | <input type="checkbox"/> | <input type="checkbox"/>  | <input type="checkbox"/>      | <input type="checkbox"/> |
| 5. My urine flow is weak or thin.                   | <input type="checkbox"/> | <input type="checkbox"/> | <input type="checkbox"/> | <input type="checkbox"/>  | <input type="checkbox"/>      | <input type="checkbox"/> |
| 6. I need to strain to empty my bladder.            | <input type="checkbox"/> | <input type="checkbox"/> | <input type="checkbox"/> | <input type="checkbox"/>  | <input type="checkbox"/>      | <input type="checkbox"/> |
| 7. I need to squat momentarily before urinating.    | <input type="checkbox"/> | <input type="checkbox"/> | <input type="checkbox"/> | <input type="checkbox"/>  | <input type="checkbox"/>      | <input type="checkbox"/> |

8. Urine dribbles onto my underwear after urinating.
9. Full bladder causes discomfort in lower abdomen or vulva.

1

---

10. How many times do you wake to urinate at night?  
 0 time  1time  2 times  3 times  4 times  5 times or more
11. Do you experience incontinence before reaching the toilet?  
 Never  Rarely  Once a Month  Once a Week  2–3 Times Weekly  Daily or More
12. Do you experience incontinence when coughing, running, or laughing?  
 Never  Rarely  Once a Month  Once a Week  2–3 Times Weekly  Daily or More
13. Do you wet the bed while sleeping?  
 Never  Rarely  Once a Month  Once a Week  2–3 Times Weekly  Daily or More

- D. Which of the 13 urinary issues troubles you the most? Item No. \_\_\_\_\_
- E. If your current urinary condition persists, how would you feel?  
 0. Delighted  1. Very Satisfied  2. Satisfied  3. Acceptable  4. Dissatisfied  5. Unhappy  
 6. Terrible
- F. Reason for Consultation (Multiple Choices Allowed)  
 1. Concerned about illness  2. Quality of life/work affected  3. Media coverage  4. Family suggestion  5. Friend suggestion

- G. Lifestyle
1. Average sleep hours per night in the past month: \_\_\_\_ hours
  2. Sleep quality:  
 1. Very Poor  2. Poor  3. Average  4. Good  5. Very Good
  3. Exercise Habit:  
 0. None  1. Occasional  2. Frequent
  4. Stress from work/life:  
 0. None  1. Mild  2. Moderate  3. Severe
  5. Overall health status in the past month:  
 1. Very Poor  2. Poor  3. Average  4. Good  5. Very Good
  6. Alcohol Consumption:  
 0. None  1. Occasional  2. Frequent
  7. Smoking:  
 0. None  1. Less than one pack/week  2. More than one pack/week

H. Medical History :

1. Have you had any of the following conditions in the past year? (Multiple Choices Allowed)
  - 1. Diabetes  2. Hypertension  3. Heart Disease  4. Chronic Lung Disease (e.g., asthma, emphysema)  5. Chronic Kidney Disease  6. Chronic Liver Disease  7. Neurological Issues (e.g., stroke, Parkinson's)  8. Mental Health Issues (e.g., anxiety, depression)  9. High Cholesterol  10. Leg Edema  11. Gynecological Issues  12. Others: \_\_\_\_\_
2. In the past year, have you taken any of the following medications regularly? (Multiple Choices Allowed)
  - 1. Diuretics  2. Sleeping pills  3. Anti-anxiety or antidepressants  4. Heart or blood pressure medication  5. Laxatives or stool softeners  6. Painkillers  7. Asthma medication  8. Female hormones  9. Others: \_\_\_\_\_
3. In the past year, have you visited a doctor due to urinary tract or bladder infections?
  - 0. None  1. Once  2. Twice  3. Three times or more
4. In the past month, have your bowel habits been normal?
  - 0. Regular, about once every 1–2 days  1. Issues with constipation or difficulty passing stool  2. Two or more times a day
5. To your knowledge, do any of your family members have similar urinary problems?
  - 0. No  1. Yes, who? \_\_\_\_\_

I. Have your urinary problems caused any of the following difficulties?

|                                                              | Not at<br>All            | A<br>Little              | Mild                     | Moderate                 | Severe                   |
|--------------------------------------------------------------|--------------------------|--------------------------|--------------------------|--------------------------|--------------------------|
| 1. Feeling fatigued or lacking energy to work                | <input type="checkbox"/> |
| 2. Impacting activities you enjoy (e.g., hiking, running)    | <input type="checkbox"/> |
| 3. Being cautious about not drinking too much water          | <input type="checkbox"/> |
| 4. Being hesitant to go out (e.g., shopping, traveling)      | <input type="checkbox"/> |
| 5. Becoming nervous or anxious                               | <input type="checkbox"/> |
| 6. Feeling frustrated or even useless                        | <input type="checkbox"/> |
| 7. Worrying that your urinary problem will worsen            | <input type="checkbox"/> |
| 8. Worrying that there are no effective treatments           | <input type="checkbox"/> |
| 9. Worrying about affecting family members (e.g., children)  | <input type="checkbox"/> |
| 10. Affecting the relationship or intimacy with your partner | <input type="checkbox"/> |
